# Supplementary material for: The hypoxia-related microRNA miR-199a-3p displays tumor suppressor functions in ovarian carcinoma
Source: PubMed Central journal article supplement (PMC4484460; doi:10.18632/oncotarget.3604), 2015-03-15
Supplement: oncotarget-06-11342-s001.pdf [file oncotarget-06-11342-s001.pdf]

## The hypoxia-related microRNA miR-199a-3p displays tumor suppressor functions in ovarian carcinoma

### Supplementary Material

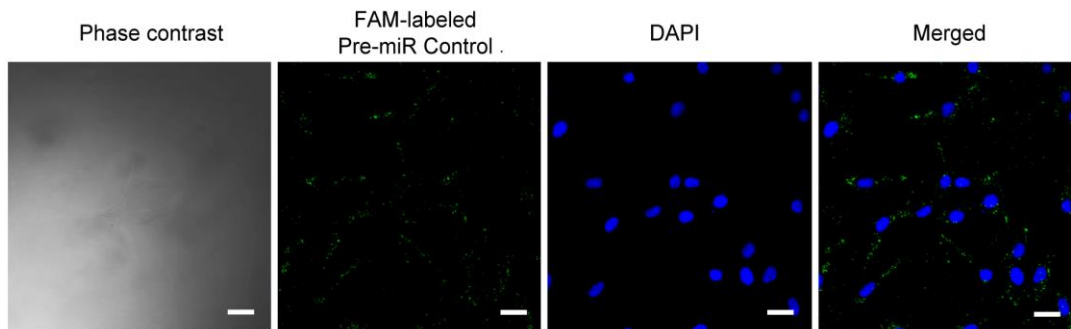

**Supplemental Figure 1:** High transfection efficacy without impairment of cell viability was confirmed by using a confocal laser scanning microscope to observe cells transfected with FAM-labeled control microRNA (green) and stained with DAPI (blue). Bar represents 50  $\mu\text{m}$ .

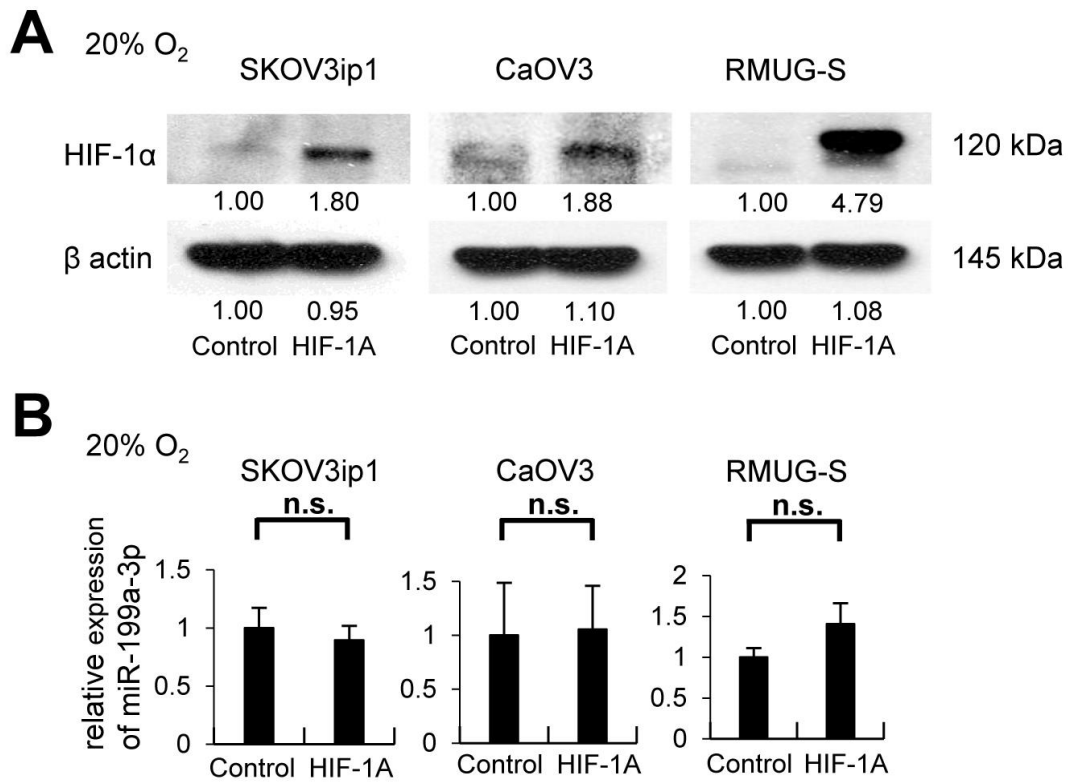

**Supplemental Figure 2:** (A) Ovarian cancer cells were transfected with a HIF-1α expression vector for 24 hours under 20% O<sub>2</sub>. Cell lysates were collected and subjected to western blotting with an antibody against HIF-1α. (B) miRNA RT-qPCR. Overexpression of HIF-1α did not influence miR-199a-3p expression. Densitometry ratios in each western blotting are shown below each blot. n.s., not significant.

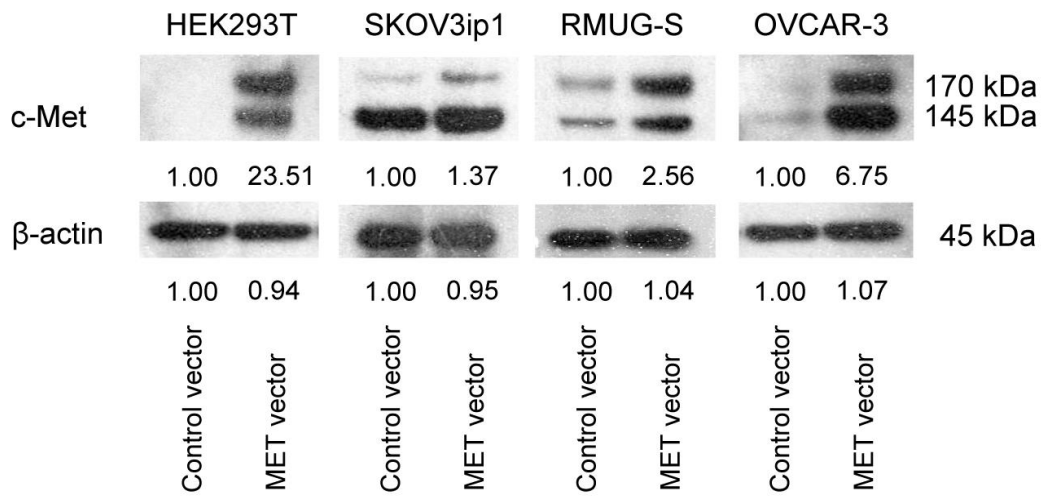

**Supplemental Figure 3:** Western blotting. Cells (HEK293T, SKOV3ip1, RMUG-S, and OVCAR-3) were transfected with an pIRES2-EGFP vector (containing *MET* or the empty control vector). Cell lysates were collected and immunoblotted with antibodies against c-Met and β-actin. Densitometry ratios in each western blotting are shown below each blot.

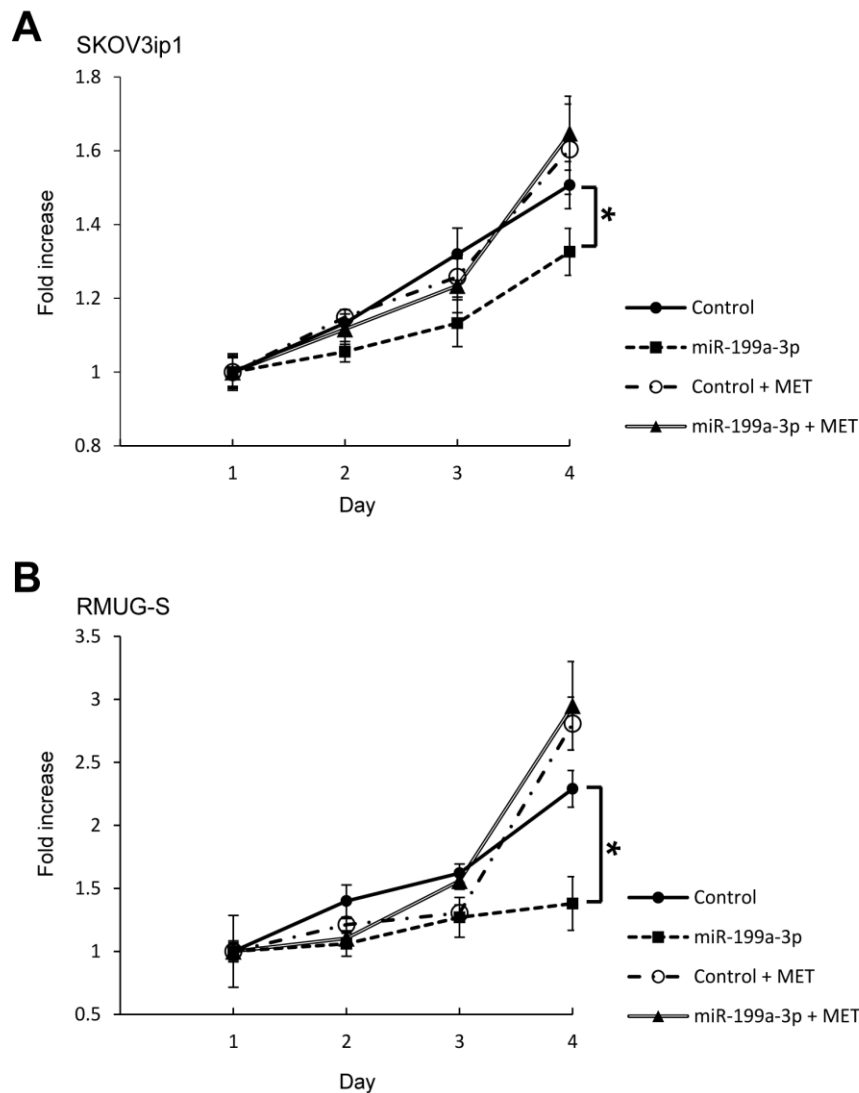

**Supplemental Figure 4:** *In vitro* cell proliferation assay. SKOV3ip1 (A) or RMUG-S (B) cells were cotransfected with miRNA (pre-miR-199a-3p or negative control miR) and an pIERS2-EGFP vector (containing *MET*, or the empty control vector). The cells ( $3 \times 10^3$  cells of SKOV3ip1 or  $6 \times 10^3$  cells of RMUG-S) were seeded onto 96-well plates and cultured 1 in DMEM supplemented with 10% FBS for 4 days. Relative viable cell number was assessed using the CyQUANT cell proliferation assay kit (Life Technologies) according to the manufacturer's instructions. Data represent mean  $\pm$  SEM;  $n = 10$  from triplicate independent experiments. \* $P < 0.05$ .

**Supplemental Table 1:** the results of miRNA RT-PCR array. Relative expression levels of miRNAs in CaOV3 and RMUG-S cells under hypoxia as compared to normoxia are shown. N/A, not available.

|                 | CaOV3  | RMUG-S |
|-----------------|--------|--------|
| hsa-let-7a      | 1.388  | 2.033  |
| hsa-let-7b      | 2.229  | 2.759  |
| hsa-let-7c      | 2.073  | 0.768  |
| hsa-let-7d      | 1.556  | 1.637  |
| hsa-let-7e      | 2.170  | 2.379  |
| hsa-let-7f      | 1.952  | 0.878  |
| hsa-let-7g      | 1.625  | 1.669  |
| hsa-miR-1       | N/A    | N/A    |
| hsa-miR-100     | 1.065  | 1.076  |
| hsa-miR-101     | 0.911  | 1.945  |
| hsa-miR-103     | 2.046  | 0.932  |
| hsa-miR-105     | N/A    | N/A    |
| hsa-miR-106a    | 0.977  | 0.427  |
| hsa-miR-106b    | 1.517  | 0.944  |
| hsa-miR-107     | 1.160  | 1.949  |
| hsa-miR-10a     | 0.589  | 0.337  |
| hsa-miR-10b     | 1.227  | 3.542  |
| hsa-miR-122     | N/A    | N/A    |
| hsa-miR-124     | N/A    | N/A    |
| hsa-miR-125a-3p | 3.309  | 2.355  |
| hsa-miR-125a-5p | 1.542  | 0.740  |
| hsa-miR-125b    | 1.954  | 1.453  |
| hsa-miR-126     | 2.263  | 0.856  |
| hsa-miR-127-3p  | 1.659  | N/A    |
| hsa-miR-127-5p  | N/A    | N/A    |
| hsa-miR-128     | 0.349  | 0.929  |
| hsa-miR-129-3p  | 6.721  | N/A    |
| hsa-miR-129-5p  | 38.217 | N/A    |
| hsa-miR-130a    | 1.246  | 1.984  |
| hsa-miR-130b    | 1.491  | 1.664  |
| hsa-miR-132     | 2.133  | 0.802  |
| hsa-miR-133a    | 12.352 | N/A    |
| hsa-miR-133b    | 17.674 | N/A    |
| hsa-miR-134     | 2.131  | N/A    |
| hsa-miR-135a    | 2.651  | 0.502  |
| hsa-miR-135b    | 1.365  | 0.823  |
| hsa-miR-136     | 8.645  | 8.900  |

|                 |        |        |
|-----------------|--------|--------|
| hsa-miR-137     | 1.404  | 0.397  |
| hsa-miR-138     | 0.934  | 0.425  |
| hsa-miR-139-3p  | N/A    | N/A    |
| hsa-miR-139-5p  | 1.795  | 0.479  |
| hsa-miR-140-3p  | 1.094  | 0.586  |
| hsa-miR-140-5p  | 1.190  | 0.705  |
| hsa-miR-141     | 1.891  | 1.128  |
| hsa-miR-142-3p  | 1.358  | N/A    |
| hsa-miR-142-5p  | N/A    | N/A    |
| hsa-miR-143     | N/A    | 18.633 |
| hsa-miR-145     | N/A    | 0.018  |
| hsa-miR-146a    | 1.804  | 3.278  |
| hsa-miR-146b-3p | 19.149 | N/A    |
| hsa-miR-146b-5p | 1.280  | 1.156  |
| hsa-miR-147     | N/A    | N/A    |
| hsa-miR-147b    | N/A    | N/A    |
| hsa-miR-148a    | 1.543  | 1.214  |
| hsa-miR-148b    | 1.089  | 0.852  |
| hsa-miR-149     | 1.713  | 0.331  |
| hsa-miR-150     | 17.163 | 0.227  |
| hsa-miR-152     | 1.356  | 1.406  |
| hsa-miR-153     | N/A    | N/A    |
| hsa-miR-154     | N/A    | N/A    |
| hsa-miR-155     | N/A    | 8.572  |
| hsa-miR-15a     | 0.033  | 0.645  |
| hsa-miR-15b     | 1.111  | 0.930  |
| hsa-miR-16      | 1.513  | 0.632  |
| hsa-miR-17      | 1.198  | 0.459  |
| hsa-miR-181a    | 4.253  | 3.001  |
| hsa-miR-181c    | 5.782  | 1.879  |
| hsa-miR-182     | 2.954  | 1.193  |
| hsa-miR-183     | 2.684  | 1.248  |
| hsa-miR-184     | N/A    | 3.432  |
| hsa-miR-185     | 1.713  | 0.821  |
| hsa-miR-186     | 1.413  | 0.493  |
| hsa-miR-187     | N/A    | N/A    |
| hsa-miR-188-3p  | N/A    | N/A    |
| hsa-miR-18a     | 0.950  | 0.435  |
| hsa-miR-18b     | 0.616  | 0.549  |
| hsa-miR-190     | 0.393  | 1.223  |
| hsa-miR-191     | 1.474  | 0.580  |
| hsa-miR-192     | 1.528  | 1.205  |
| hsa-miR-193a-3p | 1.853  | 0.491  |

|                  |          |          |
|------------------|----------|----------|
| hsa-miR-193a-5p  | 1.231    | 2.350    |
| hsa-miR-193b     | 4.039    | 2.159    |
| hsa-miR-194      | 1.897    | 1.883    |
| hsa-miR-195      | 5.078    | 0.709    |
| hsa-miR-196b     | 1.776    | 4.115    |
| hsa-miR-197      | 1.960    | 1.128    |
| hsa-miR-198      | N/A      | N/A      |
| hsa-miR-199a-3p  | 0.198    | 0.015    |
| hsa-miR-199a-5p  | N/A      | N/A      |
| hsa-miR-199b-5p  | N/A      | N/A      |
| hsa-miR-19a      | 1.214    | 0.571    |
| hsa-miR-19b      | 0.900    | 0.625    |
| hsa-miR-200a     | 1.355    | 1.301    |
| hsa-miR-200b     | 1.809    | 1.107    |
| hsa-miR-200c     | 1.740    | 0.823    |
| hsa-miR-202      | 153.027  | 19.549   |
| hsa-miR-203      | 1.515    | 0.590    |
| hsa-miR-204      | 1.090    | 18.879   |
| hsa-miR-205      | 1.290    | 0.670    |
| hsa-miR-208      | N/A      | N/A      |
| hsa-miR-208b     | N/A      | N/A      |
| hsa-miR-20a      | 0.980    | 0.877    |
| hsa-miR-20b      | 0.908    | 0.565    |
| hsa-miR-21       | 1.690    | 2.353    |
| hsa-miR-210      | 8.354    | 5.293    |
| hsa-miR-211      | 37.055   | N/A      |
| hsa-miR-212      | 2.262    | 2.338    |
| hsa-miR-214      | 79.014   | N/A      |
| hsa-miR-215      | N/A      | 1.504    |
| hsa-miR-216a     | 18.941   | N/A      |
| hsa-miR-216b     | 0.019    | 0.061    |
| hsa-miR-217      | N/A      | N/A      |
| hsa-miR-218      | 2.616    | 1.805    |
| hsa-miR-219-1-3p | 0.037    | N/A      |
| hsa-miR-219-2-3p | N/A      | N/A      |
| hsa-miR-219-5p   | N/A      | N/A      |
| hsa-miR-22       | 2405.951 | 1048.212 |
| hsa-miR-220      | N/A      | N/A      |
| hsa-miR-220b     | N/A      | N/A      |
| hsa-miR-220c     | N/A      | N/A      |
| hsa-miR-221      | 1.236    | 0.773    |
| hsa-miR-222      | 1.176    | 1.140    |
| hsa-miR-223      | 1.199    | 2.040    |

|                |        |       |
|----------------|--------|-------|
| hsa-miR-224    | 1.027  | 0.619 |
| hsa-miR-23a    | 1.010  | 1.913 |
| hsa-miR-23b    | 1.121  | 2.009 |
| hsa-miR-24     | 2.218  | 0.724 |
| hsa-miR-25     | 1.145  | 0.634 |
| hsa-miR-26a    | 1.540  | 1.751 |
| hsa-miR-26b    | 1.849  | 1.332 |
| hsa-miR-27a    | 1.970  | 0.781 |
| hsa-miR-27b    | 1.834  | 0.731 |
| hsa-miR-28-3p  | 1.355  | 0.817 |
| hsa-miR-28-5p  | N/A    | 0.756 |
| hsa-miR-296-3p | N/A    | N/A   |
| hsa-miR-296-5p | 19.338 | 0.892 |
| hsa-miR-298    | N/A    | N/A   |
| hsa-miR-299-3p | N/A    | N/A   |
| hsa-miR-299-5p | 0.925  | N/A   |
| hsa-miR-29a    | 1.535  | 1.417 |
| hsa-miR-29b    | 1.274  | 1.906 |
| hsa-miR-29c    | 1.814  | 2.005 |
| hsa-miR-301a   | 2.050  | 1.041 |
| hsa-miR-301b   | 1.761  | 3.449 |
| hsa-miR-302a   | N/A    | 9.350 |
| hsa-miR-302b   | N/A    | N/A   |
| hsa-miR-302c   | N/A    | N/A   |
| hsa-miR-30b    | 1.240  | 1.396 |
| hsa-miR-30c    | 1.634  | 0.712 |
| hsa-miR-31     | 1.962  | 0.676 |
| hsa-miR-32     | 3.151  | 0.979 |
| hsa-miR-320    | 1.678  | 0.900 |
| hsa-miR-323-3p | 1.504  | 0.284 |
| hsa-miR-324-3p | N/A    | 1.033 |
| hsa-miR-324-5p | N/A    | 1.106 |
| hsa-miR-325    | N/A    | N/A   |
| hsa-miR-326    | N/A    | 0.018 |
| hsa-miR-328    | 4.052  | 2.924 |
| hsa-miR-329    | N/A    | N/A   |
| hsa-miR-330-3p | 4.581  | 0.434 |
| hsa-miR-330-5p | N/A    | 0.717 |
| hsa-miR-331-3p | 1.576  | 0.817 |
| hsa-miR-331-5p | 1.054  | 0.487 |
| hsa-miR-335    | 0.542  | N/A   |
| hsa-miR-337-5p | 2.009  | 9.019 |
| hsa-miR-338-3p | 1.547  | 0.037 |



|                |       |       |
|----------------|-------|-------|
| hsa-miR-339-3p | 1.832 | 0.397 |
| hsa-miR-339-5p | 1.208 | 0.335 |
| hsa-miR-33b    | N/A   | N/A   |
| hsa-miR-340    | 1.488 | 0.956 |
| hsa-miR-342-3p | 2.023 | 0.877 |
| hsa-miR-342-5p | N/A   | N/A   |
| hsa-miR-345    | 1.330 | 0.411 |
| hsa-miR-346    | N/A   | N/A   |
| hsa-miR-34a    | 1.599 | 0.996 |
| hsa-miR-34c-5p | 3.325 | 0.253 |
| hsa-miR-361-5p | 1.835 | 0.838 |
| hsa-miR-362-3p | 5.877 | 1.024 |
| hsa-miR-362-5p | 2.365 | 0.278 |
| hsa-miR-363    | 1.078 | 0.530 |
| hsa-miR-365    | 3.298 | 2.249 |
| hsa-miR-367    | N/A   | N/A   |
| hsa-miR-369-3p | N/A   | 4.767 |
| hsa-miR-369-5p | 9.200 | N/A   |
| hsa-miR-370    | 7.766 | N/A   |
| hsa-miR-371-3p | N/A   | N/A   |
| hsa-miR-372    | 0.143 | 1.251 |
| hsa-miR-373    | 0.059 | 9.404 |
| hsa-miR-374a   | 1.419 | 1.233 |
| hsa-miR-374b   | 1.388 | 1.112 |
| hsa-miR-375    | 1.579 | 0.883 |
| hsa-miR-376a   | 1.160 | 4.746 |
| hsa-miR-376b   | 0.071 | N/A   |
| hsa-miR-376c   | 1.667 | 0.834 |
| hsa-miR-377    | N/A   | N/A   |
| hsa-miR-379    | 1.281 | N/A   |
| hsa-miR-380    | 0.077 | N/A   |
| hsa-miR-381    | N/A   | N/A   |
| hsa-miR-382    | 2.558 | N/A   |
| hsa-miR-383    | N/A   | N/A   |
| hsa-miR-384    | N/A   | N/A   |
| hsa-miR-409-5p | N/A   | N/A   |
| hsa-miR-410    | 2.679 | 2.753 |
| hsa-miR-411    | 2.194 | N/A   |
| hsa-miR-412    | N/A   | N/A   |
| hsa-miR-422a   | 1.127 | 0.395 |
| hsa-miR-423-5p | 3.081 | 1.697 |
| hsa-miR-424    | 0.993 | 0.286 |
| hsa-miR-425    | 1.891 | 0.962 |

|                 |          |        |
|-----------------|----------|--------|
| hsa-miR-429     | 1.590    | 0.669  |
| hsa-miR-431     | 1.915    | N/A    |
| hsa-miR-433     | 2.634    | N/A    |
| hsa-miR-448     | N/A      | N/A    |
| hsa-miR-449a    | 21.862   | 1.121  |
| hsa-miR-449b    | N/A      | 2.585  |
| hsa-miR-450a    | 0.071    | 0.802  |
| hsa-miR-450b-3p | N/A      | N/A    |
| hsa-miR-450b-5p | 0.062    | 70.771 |
| hsa-miR-451     | 0.075    | N/A    |
| hsa-miR-452     | 2.123    | 1.007  |
| hsa-miR-453     | N/A      | N/A    |
| hsa-miR-454     | 1.286    | 0.567  |
| hsa-miR-455-3p  | 74.288   | N/A    |
| hsa-miR-455-5p  | 2.324    | 19.018 |
| hsa-miR-483-5p  | 11.370   | 1.560  |
| hsa-miR-484     | 0.760    | 0.647  |
| hsa-miR-485-3p  | 1.629    | 0.035  |
| hsa-miR-485-5p  | N/A      | N/A    |
| hsa-miR-486-3p  | 4.162    | N/A    |
| hsa-miR-486-5p  | 2.403    | N/A    |
| hsa-miR-487a    | 1381.517 | 0.001  |
| hsa-miR-487b    | 1.657    | N/A    |
| hsa-miR-488     | N/A      | N/A    |
| hsa-miR-489     | 1.087    | 1.119  |
| hsa-miR-490-3p  | N/A      | N/A    |
| hsa-miR-491-3p  | N/A      | N/A    |
| hsa-miR-491-5p  | 1.605    | 0.018  |
| hsa-miR-492     | N/A      | N/A    |
| hsa-miR-493     | 2.344    | N/A    |
| hsa-miR-494     | 2.009    | 3.201  |
| hsa-miR-495     | 2.357    | N/A    |
| hsa-miR-496     | N/A      | N/A    |
| hsa-miR-499-3p  | N/A      | N/A    |
| hsa-miR-499-5p  | N/A      | 38.008 |
| hsa-miR-500     | 1.187    | 0.287  |
| hsa-miR-501-3p  | N/A      | N/A    |
| hsa-miR-501-5p  | 9.308    | 0.468  |
| hsa-miR-502-3p  | 14.059   | 0.348  |
| hsa-miR-502-5p  | 18.656   | 1.135  |
| hsa-miR-503     | 15.399   | 0.879  |
| hsa-miR-504     | N/A      | N/A    |
| hsa-miR-505     | N/A      | N/A    |

|                  |        |          |
|------------------|--------|----------|
| hsa-miR-506      | N/A    | N/A      |
| hsa-miR-507      | N/A    | N/A      |
| hsa-miR-508-3p   | N/A    | N/A      |
| hsa-miR-508-5p   | N/A    | N/A      |
| hsa-miR-509-3-5p | N/A    | N/A      |
| hsa-miR-509-5p   | N/A    | N/A      |
| hsa-miR-510      | N/A    | N/A      |
| hsa-miR-511      | 0.081  | 9.585    |
| hsa-miR-512-3p   | 19.547 | 1.611    |
| hsa-miR-512-5p   | N/A    | 1.237    |
| hsa-miR-513-5p   | N/A    | N/A      |
| hsa-miR-515-3p   | N/A    | 2.790    |
| hsa-miR-515-5p   | N/A    | 2.619    |
| hsa-miR-516a-5p  | N/A    | 0.524    |
| hsa-miR-516b     | N/A    | 9.022    |
| hsa-miR-517a     | N/A    | 3.578    |
| hsa-miR-517b     | N/A    | 9516.386 |
| hsa-miR-517c     | 0.074  | 3.056    |
| hsa-miR-518a-3p  | N/A    | 1.286    |
| hsa-miR-518a-5p  | N/A    | 19.197   |
| hsa-miR-518b     | 39.221 | 1.723    |
| hsa-miR-518c     | N/A    | 4.831    |
| hsa-miR-518d-3p  | N/A    | 1.034    |
| hsa-miR-518d-5p  | N/A    | 1.163    |
| hsa-miR-518e     | 18.682 | 1.851    |
| hsa-miR-518f     | N/A    | 1.458    |
| hsa-miR-519a     | 4.059  | 1.393    |
| hsa-miR-519c-3p  | N/A    | 3.709    |
| hsa-miR-519d     | N/A    | 1.267    |
| hsa-miR-519e     | 0.030  | 1.408    |
| hsa-miR-520a-3p  | N/A    | 1.673    |
| hsa-miR-520a-5p  | N/A    | 2.050    |
| hsa-miR-520b     | N/A    | 1.589    |
| hsa-miR-520d-5p  | N/A    | 74.251   |
| hsa-miR-520e     | N/A    | 0.571    |
| hsa-miR-520f     | N/A    | 2.831    |
| hsa-miR-520g     | N/A    | 1.800    |
| hsa-miR-521      | N/A    | 1.440    |
| hsa-miR-522      | 3.193  | 1.246    |
| hsa-miR-523      | 0.046  | 2.318    |
| hsa-miR-524-5p   | N/A    | N/A      |
| hsa-miR-525-3p   | N/A    | 1.161    |
| hsa-miR-525-5p   | N/A    | 1.206    |

|                 |        |         |
|-----------------|--------|---------|
| hsa-miR-526b    | N/A    | 2.265   |
| hsa-miR-532-3p  | 0.497  | 0.830   |
| hsa-miR-532-5p  | 1.049  | 0.827   |
| hsa-miR-539     | 1.132  | N/A     |
| hsa-miR-541     | N/A    | N/A     |
| hsa-miR-542-3p  | 4.507  | 1.298   |
| hsa-miR-542-5p  | 0.048  | 9.321   |
| hsa-miR-544     | N/A    | N/A     |
| hsa-miR-545     | 2.862  | 0.532   |
| hsa-miR-548a-3p | N/A    | N/A     |
| hsa-miR-548a-5p | N/A    | N/A     |
| hsa-miR-548b-3p | N/A    | 0.000   |
| hsa-miR-548b-5p | 0.136  | 11.319  |
| hsa-miR-548c-3p | N/A    | N/A     |
| hsa-miR-548c-5p | 0.026  | 3.489   |
| hsa-miR-548d-3p | N/A    | 0.200   |
| hsa-miR-548d-5p | 0.315  | 0.265   |
| hsa-miR-551b    | N/A    | N/A     |
| hsa-miR-556-3p  | N/A    | N/A     |
| hsa-miR-556-5p  | N/A    | N/A     |
| hsa-miR-561     | 0.116  | N/A     |
| hsa-miR-570     | N/A    | N/A     |
| hsa-miR-574-3p  | 2.007  | 1.335   |
| hsa-miR-576-3p  | 1.422  | 1.040   |
| hsa-miR-576-5p  | N/A    | 0.040   |
| hsa-miR-579     | 0.052  | 0.476   |
| hsa-miR-582-3p  | 0.025  | 3.128   |
| hsa-miR-582-5p  | 0.073  | 1.177   |
| hsa-miR-589     | 0.054  | 3.828   |
| hsa-miR-590-5p  | 1.728  | 0.426   |
| hsa-miR-597     | 0.347  | 4.910   |
| hsa-miR-598     | N/A    | 1.246   |
| hsa-miR-615-3p  | N/A    | N/A     |
| hsa-miR-615-5p  | 1.706  | N/A     |
| hsa-miR-616     | 18.401 | N/A     |
| hsa-miR-618     | 0.139  | N/A     |
| hsa-miR-624     | N/A    | N/A     |
| hsa-miR-625     | 1.474  | 2.249   |
| hsa-miR-627     | 0.141  | 0.801   |
| hsa-miR-628-5p  | 2.134  | 1.911   |
| hsa-miR-629     | 0.528  | 216.819 |
| hsa-miR-636     | 10.926 | 194.666 |
| hsa-miR-642     | 0.874  | 58.662  |

|                |        |          |
|----------------|--------|----------|
| hsa-miR-651    | N/A    | 0.000    |
| hsa-miR-652    | 3.100  | 1569.819 |
| hsa-miR-653    | N/A    | 4.194    |
| hsa-miR-654-3p | 1.401  | N/A      |
| hsa-miR-654-5p | N/A    | N/A      |
| hsa-miR-655    | 1.196  | 0.000    |
| hsa-miR-660    | 1.024  | 3.939    |
| hsa-miR-671-3p | 1.821  | 36.293   |
| hsa-miR-672    | 0.073  | N/A      |
| hsa-miR-674    | N/A    | N/A      |
| hsa-miR-708    | 1.125  | 9.597    |
| hsa-miR-744    | 1.922  | 0.353    |
| hsa-miR-758    | 2.082  | N/A      |
| hsa-miR-871    | N/A    | N/A      |
| hsa-miR-872    | N/A    | N/A      |
| hsa-miR-873    | N/A    | N/A      |
| hsa-miR-874    | N/A    | N/A      |
| hsa-miR-875-3p | N/A    | N/A      |
| hsa-miR-876-3p | 19.315 | N/A      |
| hsa-miR-876-5p | 1.137  | N/A      |
| hsa-miR-885-3p | N/A    | N/A      |
| hsa-miR-885-5p | 2.416  | 63.909   |
| hsa-miR-886-3p | N/A    | N/A      |
| hsa-miR-886-5p | N/A    | N/A      |
| hsa-miR-887    | N/A    | N/A      |
| hsa-miR-888    | N/A    | 4.880    |
| hsa-miR-889    | 0.599  | N/A      |
| hsa-miR-890    | N/A    | N/A      |
| hsa-miR-891a   | N/A    | N/A      |
| hsa-miR-891b   | N/A    | N/A      |
| hsa-miR-892a   | N/A    | N/A      |
| hsa-miR-9      | 1.440  | 0.537    |
| hsa-miR-92a    | 0.998  | 0.860    |
| hsa-miR-93     | 1.073  | 0.613    |
| hsa-miR-95     | 1.680  | 2.019    |
| hsa-miR-96     | 1.881  | 2.290    |
| hsa-miR-98     | 4.463  | 1.262    |
| hsa-miR-99a    | 1.061  | 1.292    |
| hsa-miR-99b    | 1.496  | 134.692  |
| hsa-miR-885-5p | 2.416  | 63.909   |
| hsa-let-7b     | 2.229  | 2.759    |
| hsa-let-7e     | 2.170  | 2.379    |

**Supplemental Table 2:** Patient characteristics.

|                                                              | Normal ovary<br>(control) | Ovarian cancer<br>(high-grade serous<br>adenocarcinoma) |
|--------------------------------------------------------------|---------------------------|---------------------------------------------------------|
| Number of patients                                           | 5                         | 9                                                       |
| Median age in years (range)                                  | 57.8 (44–64)              | 54.7 (29–77)                                            |
| Number of premenopausal patients (%)                         | 1 (20)                    | 4 (44)                                                  |
| Number of postmenopausal patients (%)                        | 4 (80)                    | 5 (55)                                                  |
| Disease                                                      |                           |                                                         |
| Number of patients with myoma (%)                            | 3 (60)                    |                                                         |
| Number of patients with CIN3 (%)                             | 1 (20)                    |                                                         |
| Number of patients with unilateral ovarian fibroma (%)       | 1 (20)                    |                                                         |
| Number of patients with high-grade serous adenocarcinoma (%) |                           | 9 (100)                                                 |
| FIGO stage                                                   |                           |                                                         |
| Number at stage IIc (%)                                      |                           | 1 (11)                                                  |
| Number at stage IIIb (%)                                     |                           | 1 (11)                                                  |
| Number at stage IIIc (%)                                     |                           | 7 (77)                                                  |
| Residual tumor                                               |                           |                                                         |
| Number of tumors ≤1 cm (%)                                   |                           | 8 (88)                                                  |
| Number of tumors >1 cm (%)                                   |                           | 1 (11)                                                  |
| Chemotherapy                                                 |                           |                                                         |
| Number of patients treated with paclitaxel + carboplatin (%) |                           | 9 (100)                                                 |

CIN3; Cervical intraepithelial neoplasia 3
